# Supplementary material for: Characterization of chondroitin sulfate in stem cells derived from umbilical cord blood in rats
Source: PubMed Central journal article supplement (PMC8789104; doi:10.1371/journal.pone.0262854), 2022-01-25
Supplement: pone.0262854.s001.pdf [file pone.0262854.s001.pdf]

## Supporting Information

Characterization of chondroitin sulfate in stem cells derived from umbilical cord blood in rats.

by Keiko Nakanishi, Kyohei Higashi, Toshihiko Toida, and Masato Asai

### Supplementary Information

#### *Isolation and culture of rat mononuclear cells (MNCs) derived from UCBCs*

MNCs were isolated using Ficoll-Conray solution (Lymphosepar I, Immuno-Biological Laboratories) or Ficoll-Paque PLUS solution (GE Healthcare) and were maintained in Stemline hematopoietic stem cell expansion medium (Stemline I, 0189, Sigma-Aldrich Co.) or StemSpan™ serum-free expansion medium (#ST-09650, Stemcell Technologies) containing 8 mM glutamine (Gibco, Life Technologies), 50 U/mL penicillin G, 0.025 mg/mL streptomycin (Meiji Seika Ltd.), and 0.1 mM 2-mercaptoethanol, under 95% ambient air, 5% CO<sub>2</sub>, and an H<sub>2</sub>O-saturated atmosphere at 37 °C. The cells were expanded using a cocktail of growth factors containing 20 ng/mL of rat stem cell factor, rat thrombopoietin, rat IL-6, and human Flt-3 ligand (all purchased from PeproTech Inc.) and then cryopreserved [11].

#### *Quantification of immunocytochemical staining*

Quantification of immunocytochemical staining was performed using the public domain Image J program (Rasband, 1997; Schneider et al., 2012) after taking photomicrographs as described previously [17]. The photomicrographs in each experiment were taken under the same conditions and the images were changed into gray scale with Photoshop software (Adobe Systems Inc., San Jose, CA, USA), and analyzed at an equal threshold in Image J. Fluorescent images of at least 10 fields per coverslip (x40 objective) were obtained using a fluorescence microscope (Nikon, Eclipse E800), and the acquired images were subjected to particle analyses using Image J software. The positive cells in each field were counted and the number was expressed as the percentage of the total number of DAPI-positive cells. Three (for CD133 staining, adult MNCs) or four (for 1B5 staining, UCB-MNCs) independent experiments were carried out.

#### *Quantitative analyses of GAGs*

Microscale isolation of GAGs was performed according to the method of Zhang et al. [29]. Briefly, the filtered extracts were purified on a Vivapure Q mini H spin column (Sartorius AG) which was centrifuged then washed three times with 450 µL of 0.2 M NaCl. Crude GAGs were then eluted from the column by washing two times with 500 µL of 16% NaCl. The GAGs were precipitated from the supernatant by the addition of four volumes of cold methanol for 16 h at 4 °C and were recovered by centrifugation at 11,000 x g for 30 min. The GAG samples were

incubated in a reaction mixture (35  $\mu$ L) containing 28.6 mM Tris-acetate (pH 8.0) and 50 mIU of Chase ABC (and Chase ACII) for 16 h at 37 °C. Depolymerized samples were boiled and evaporated, and the unsaturated disaccharides of CS/DS were collected on an Amicon Ultra centrifugal Filter 30 K device (EMD Millipore). The remaining HS samples in the filters of the spin column were transferred to new microtubes and incubated in 16  $\mu$ L of reaction mixture (pH 7.0) containing 1 mIU heparinase I, 1 mIU heparinase II, 1 mIU heparinase III, 31.3 mM sodium acetate and 3.13 mM calcium acetate for 16 h at 37 °C. Unsaturated disaccharide analysis of CS/DS and HS was performed by reversed phase ion-pair chromatography with sensitive and specific post-column detection. A gradient was applied at a flow rate of 1.0 mL/min on Senshu Pak Dicosil (4.6  $\times$  150 mm; Senshu Scientific, Tokyo, Japan) at 60°C. The eluent buffers were as follows: A, 10 mM tetra-*n*-butylammonium hydrogen sulfate in 12% methanol; B, 0.2 M NaCl in buffer A. Aqueous (0.5% (w/v)) 2-cyanoacetamide solution and 1 M NaOH were added to the eluent at the same flow rates (0.5 mL/min) by using a double plunger pump. The effluent was then monitored fluorometrically (excitation, 346 nm; emission, 410 nm).

## References

- 1) Rasband, W.S. *ImageJ*, U. S. National Institutes of Health, Bethesda, Maryland, USA (1997-2012). Available at: <http://imagej.nih.gov/ij/>
- 2) Schneider, C.A., Rasband, W.S. & Eliceiri, K.W. NIH Image to ImageJ: 25 years of image analysis. *Nature Methods* **9**, 671-675 (2012).

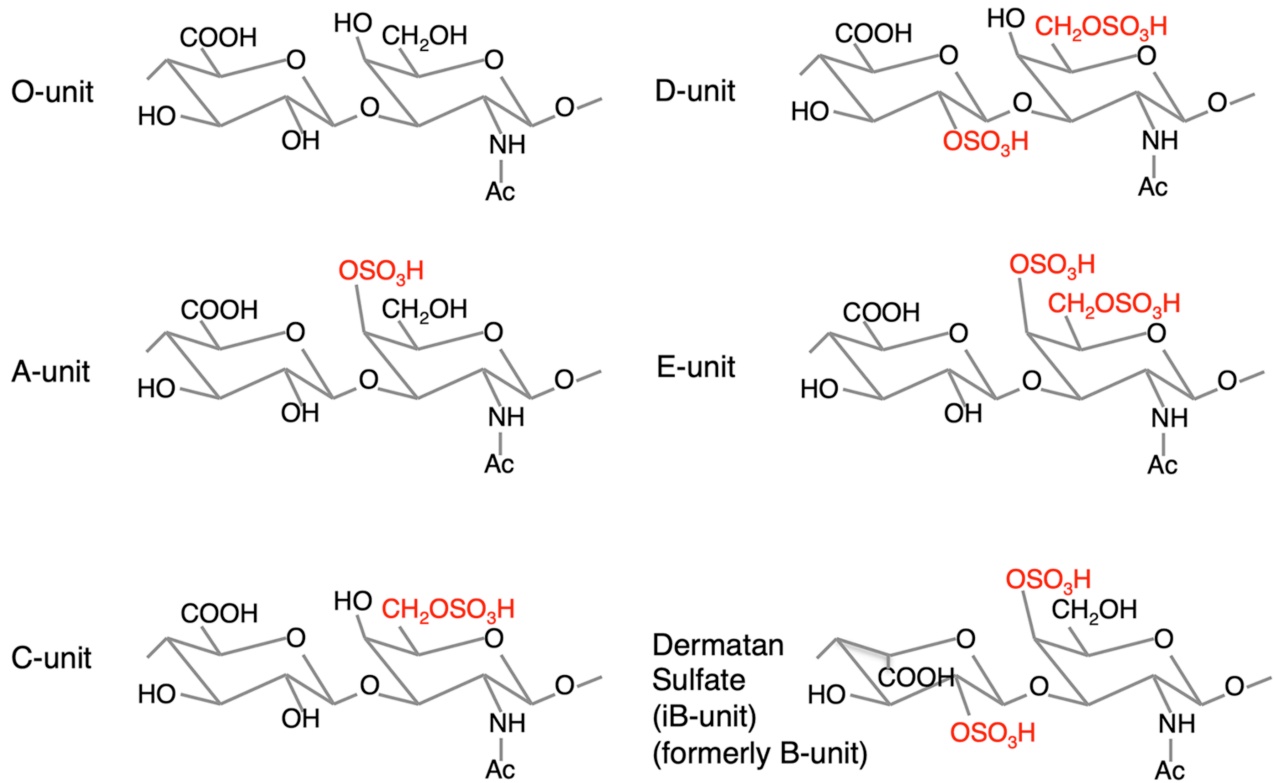

### S1 Fig

#### Structure of disaccharide unit of chondroitin sulfate (CS)/dermatan sulfate (DS) chains.

The CS chain consists of repeating disaccharide units of glucuronic acid (GlcA) and *N*-acetylgalactosamine (GalNAc) with different numbers and positions of sulfation; namely, O, A, C, D, and E. Dermatan sulfate (DS, formerly CS-B), another isomeric variant of CS, has iduronic acid (IdoA)-containing disaccharide units instead of GlcA (iB-unit). The figure was made according to Lamari and Karamanos [5].

**S1 Table Results of Disaccharide analyses (CS/DS)**

| CS/<br>DS                | Cell<br>number<br>(1x10 <sup>6</sup><br>cells) | Unsaturated disaccharide units |                   |                   |                     |                       |                       |                       |                     | ng/mg<br>protein | Amount<br>of<br>protein<br>(mg) | Amount<br>of<br>CS/DS<br>(ng) |
|--------------------------|------------------------------------------------|--------------------------------|-------------------|-------------------|---------------------|-----------------------|-----------------------|-----------------------|---------------------|------------------|---------------------------------|-------------------------------|
|                          |                                                | ΔDi-<br>0S<br>(%)              | ΔDi-<br>4S<br>(%) | ΔDi-<br>6S<br>(%) | ΔDi-<br>UA2S<br>(%) | ΔDi-<br>di4,6S<br>(%) | ΔDi-<br>di2,4S<br>(%) | ΔDi-<br>di2,6S<br>(%) | ΔDi-<br>triS<br>(%) |                  |                                 |                               |
| UCBC<br>1                | 16                                             | 21.9                           | 75.7              | 0.5               | ND                  | 1.9                   | ND                    | ND                    | ND                  | 330.4            | 1009.9                          | 333.7                         |
| UCBC<br>2                | 15                                             | 12.7                           | 84.3              | 0.3               | ND                  | 2.7                   | ND                    | ND                    | ND                  | 408.2            | 1147.3                          | 468.3                         |
| UCBC<br>3                | 7                                              | 14.4                           | 82                | 0.5               | ND                  | 3.1                   | ND                    | ND                    | ND                  | 716.2            | 625.3                           | 447.8                         |
| UCBC<br>4                | 22                                             | 12.4                           | 83                | 0.3               | ND                  | 4.2                   | ND                    | ND                    | ND                  | 508.7            | 1867.0                          | 949.8                         |
| UCB-<br>MNC <sup>a</sup> | 3.8                                            | 13.7                           | 86.3              | 0.0               | ND                  | ND                    | ND                    | ND                    | ND                  | 237.9            | 90.1                            | 21.4                          |
| MNC1                     | 13                                             | ND                             | 80.8              | 19.2              | ND                  | ND                    | ND                    | ND                    | ND                  | 76.6             | 142.3                           | 10.9                          |
| MNC2                     | 10                                             | 6.8                            | 89.3              | 3.9               | ND                  | ND                    | ND                    | ND                    | ND                  | 149              | 142.3                           | 21.2                          |
| MNC3                     | 8                                              | 6.3                            | 89.9              | 3.8               | ND                  | ND                    | ND                    | ND                    | ND                  | 235.8            | 79.1                            | 18.7                          |

<sup>a</sup>UCB-MNC(collected from 70 pups), ΔDi-0S, deoxy-α-L-threo-hex-4-enopyranosyluronic acid(ΔUA)(1→3)*N*-acetylgalactosamine (GalNAc); ΔDi-4S, ΔUA(1→3)GalNAc4S, where S is sulfo; ΔDi-6S, ΔUA (1→3) GalNAc6S; ΔDi-UA2S, ΔUA2S (1→3) GalNAc; ΔDi-di4,6S, ΔUA (1→3) GalNAc4S6S; ΔDi-di2,4S, ΔUA2S (1→3) GalNAc4S; ΔDi-di2,6S, ΔUA2S (1→3) GalNAc6S; ΔDi-TriS, ΔUA2S (1→3) GalNAc4S6S; ND, not detected.

**S2 Table Results of Disaccharide analyses (HS)**

| HS                       | Cell<br>number<br>(1x10 <sup>6</sup><br>cells) | Unsaturated disaccharide units |               |               |                 |                    |                 | ng/mg<br>protein | Amount of<br>protein<br>(mg) | Amount<br>of HS<br>(ng) |
|--------------------------|------------------------------------------------|--------------------------------|---------------|---------------|-----------------|--------------------|-----------------|------------------|------------------------------|-------------------------|
|                          |                                                | ΔDi-0S<br>(%)                  | ΔDi-NS<br>(%) | ΔDi-6S<br>(%) | ΔDi-NS6S<br>(%) | ΔDi-NSUA<br>2S (%) | ΔDi-triS<br>(%) |                  |                              |                         |
| UCBC1                    | 16                                             | 20.6                           | 34.2          | 6.4           | 3.9             | 11.9               | 23.0            | 150.7            | 1009.9                       | 152.2                   |
| UCBC2                    | 15                                             | 19.2                           | 27.3          | 7.0           | 4.9             | 17.4               | 24.1            | 108.3            | 1147.3                       | 124.2                   |
| UCBC3                    | 7                                              | 25.9                           | 43.2          | 5.8           | 2.5             | 8.4                | 14.2            | 177.7            | 625.3                        | 111.1                   |
| UCBC4                    | 22                                             | 18.5                           | 35.5          | 5.0           | 2.9             | 14.1               | 24.0            | 154.0            | 1867.0                       | 287.4                   |
| UCB-<br>MNC <sup>a</sup> | 3.8                                            | ND                             | ND            | ND            | ND              | ND                 | ND              | ND               | 90.1                         | ND                      |
| MNC1                     | 13                                             | 19.0                           | 81.0          | ND            | ND              | ND                 | ND              | 5.6              | 142.3                        | 0.8                     |
| MNC2                     | 10                                             | 42.7                           | 57.3          | ND            | ND              | ND                 | ND              | 9.4              | 142.3                        | 1.3                     |
| MNC3                     | 8                                              | 100.0                          | ND            | ND            | ND              | ND                 | ND              | 7.5              | 79.1                         | 0.6                     |

<sup>a</sup>UCB-MNC(collected from 70 pups), ΔDi-0S, ΔUA (1→4) *N*-acetylglucosamine (GlcNAc); ΔDi-NS, ΔUA (1→4) *N*-sulfated glucosamine (GlcNS); ΔDi-6S, ΔUA (1→4) GlcNAc6S; ΔDi-NS6S, ΔUA (1→4) GlcNS6S; ΔDi-NSUA2S, ΔUA2S (1→4) GlcNS; ΔDi-TriS, ΔUA2S (1→4) GlcNS6S; ND, not detected.

## Supporting Information

The values behind the means, standard deviations and other measures reported;

Fig. 2 (text, line 235); raw data of percentage of 1B5-positive cells

| Fig.2 raw data of 1B5 staining |      |       |           |      |      |           |      |       |           |      |       |  |
|--------------------------------|------|-------|-----------|------|------|-----------|------|-------|-----------|------|-------|--|
| y25                            |      |       | 609Di0S   |      |      | 630Di0S   |      |       | 721Di0S   |      |       |  |
| file name                      | dapi | 1B5   | file name | Dapi | 1B5  | file name | Dapi | 1B5   | file name | Dapi | 1B5   |  |
| 1d                             | 197  | 4     | 1d        | 40   | 3    | 34d       | 34   | 1     | 70d       | 40   | 1     |  |
| 3d                             | 204  | 1     | 4d        | 25   | 1    | 37d       | 31   | 4     | 73d       | 36   | 3     |  |
| 5d                             | 175  | 3     | 7d        | 33   | 1    | 40d       | 41   | 2     | 76d       | 44   | 1     |  |
| 9d                             | 221  | 5     | 10d       | 37   | 3    | 43d       | 44   | 4     | 79d       | 13   | 1     |  |
| 11d                            | 241  | 7     | 13d       | 33   | 2    | 46d       | 35   | 3     | 82d       | 23   | 2     |  |
| 13d                            | 278  | 4     | 16d       | 25   | 3    | 49d       | 28   | 2     | 85d       | 16   | 0     |  |
| 15d                            | 248  | 10    | 19d       | 31   | 5    | 52d       | 19   | 7     | 88d       | 44   | 2     |  |
| 17d                            | 217  | 4     | 22d       | 26   | 1    | 55d       | 20   | 5     | 91d       | 78   | 3     |  |
| 19d                            | 220  | 5     | 25d       | 26   | 2    | 58d       | 27   | 3     | 94d       | 34   | 2     |  |
| 21d                            | 198  | 4     | 28d       | 33   | 5    | 61d       | 40   | 4     | 97d       | 15   | 2     |  |
| 23d                            | 237  | 4     | 31d       | 29   | 3    | 64d       | 34   | 3     | 100d      | 42   | 2     |  |
|                                |      |       |           |      |      | 67d       | 49   | 4     |           |      |       |  |
| sum                            | 2436 | 51    | sum       | 338  | 29   | sum       | 402  | 42    | sum       | 385  | 19    |  |
| 1B5/dapi(%)                    |      | 2.094 |           |      | 8.58 |           |      | 10.45 |           |      | 4.935 |  |

| Fig.2 1B5 summary |             |
|-------------------|-------------|
|                   | 1B5/DAPI(%) |
| y25               | 2.094       |
| 609Di0S           | 8.58        |
| 630Di0S           | 10.45       |
| 721Di0S           | 4.935       |
|                   |             |
| average           | 6.514       |
| sd                | 3.732       |
| sem               | 1.866       |

Table 1, 2, and 3; Raw data were shown in S1 and S2 Table.

Table 4; SCE-UCBC & UCB-MNC; These were cited from Nakanishi et al, 2017 [ref. 17].

Table 4 ; Raw data of CFU-GM assay in adult MNC

| Table 4/ Fig.4 adultMNC-CFU-GMassay raw data |                  |         |         |      |              |
|----------------------------------------------|------------------|---------|---------|------|--------------|
| seeded cell #                                | 2x10e4 cell/well |         |         |      | total cell # |
|                                              | colony #         | average | (%)     |      | x10e6        |
| MNC3-1                                       | 11               | 8.5     | 0.0425  |      | 13           |
| MNC3-2                                       | 6                |         |         |      |              |
|                                              |                  |         |         |      |              |
| MNC4-1                                       | 2                | 4       | 0.02    |      | 10           |
| MNC4-2                                       | 6                |         |         |      |              |
|                                              |                  |         |         |      |              |
| MNC5-1                                       | 10               | 8.5     | 0.0425  |      | 8            |
| MNC5-2                                       | 7                |         |         |      |              |
|                                              |                  |         |         |      |              |
|                                              |                  | mean    | 0.035   | mean | 10.33333     |
|                                              |                  | SD      | 0.01299 | SD   | 2.516611     |
|                                              |                  | SEM     | 0.0075  | SEM  | 1.452966     |

Adult MNC; raw data of CD133 staining

| Table4-adultMNC-CD133 raw data |       |       |  |           |      |       |  |           |      |       |
|--------------------------------|-------|-------|--|-----------|------|-------|--|-----------|------|-------|
| 624-M                          |       |       |  | 922-M1    |      |       |  | 922-M2    |      |       |
| file name                      | DAPI  | CD133 |  | file name | DAPI | CD133 |  | file name | DAPI | cd133 |
| 105d                           | 57    | 5     |  | 1d        | 63   | 2     |  | 21d       | 167  | 3     |
| 107d                           | 46    | 7     |  | 3d        | 86   | 8     |  | 23d       | 177  | 8     |
| 109d                           | 87    | 4     |  | 5d        | 98   | 7     |  | 25d       | 174  | 11    |
| 111d                           | 65    | 10    |  | 7d        | 86   | 5     |  | 27d       | 165  | 5     |
| 113d                           | 103   | 14    |  | 9d        | 84   | 4     |  | 29d       | 157  | 7     |
| 115d                           | 87    | 4     |  | 11d       | 74   | 5     |  | 31d       | 168  | 5     |
| 117d                           | 101   | 8     |  | 13d       | 92   | 5     |  | 33d       | 177  | 9     |
| 119d                           | 122   | 7     |  | 15d       | 70   | 2     |  | 35d       | 136  | 7     |
| 121d                           | 104   | 7     |  | 17d       | 88   | 3     |  | 37d       | 165  | 11    |
| 123d                           | 65    | 3     |  | 19d       | 78   | 4     |  | 39d       | 177  | 8     |
|                                |       |       |  |           |      |       |  |           |      |       |
| sum                            | 837   | 69    |  |           | 819  | 45    |  |           | 1663 | 74    |
| CD133/DAPI(%)                  | 8.244 |       |  |           |      | 5.495 |  |           |      | 4.45  |

| Table4 CD133/DAPI(%) |       |  |
|----------------------|-------|--|
| 624-M                | 8.244 |  |
| 922-M1               | 5.495 |  |
| 922-M2               | 4.45  |  |
|                      |       |  |
| average              | 6.063 |  |
| sd                   | 1.96  |  |
| sem                  | 1.131 |  |

- The values used to build graphs;

Fig. 5; Raw data of CFU-GM assay

| Fig.5 CFU-GM assay Raw data |                                  |         |              |       |           |                                   |         |       |       |
|-----------------------------|----------------------------------|---------|--------------|-------|-----------|-----------------------------------|---------|-------|-------|
| 609CFU                      |                                  |         |              |       | 630CFU    |                                   |         |       |       |
| well                        | 1x10 <sup>4</sup> cell/well s    |         | CFU-GM assay |       | well      | 1x10 <sup>4</sup> cells/well seed |         |       |       |
|                             | colony #                         | average | (%)          |       |           | colony #                          | average | %     |       |
| pbs1                        | 63                               | 62      | 0.62         | 100   | 630pbs1   | 86                                | 85.5    | 0.855 | 100   |
| pbs2                        | 61                               |         |              |       | 630pbs2   | 85                                |         |       |       |
| ChABC1                      | 54                               | 51.5    | 0.515        | 83.06 | 630chabc1 | 78                                | 73      | 0.73  | 85.38 |
| ChABC2                      | 49                               |         |              |       | 630chabc2 | 68                                |         |       |       |
| CSE1                        | 59                               | 54      | 0.54         | 87.1  | 630cse1   | 75                                | 68.5    | 0.685 | 80.12 |
| CSE2                        | 49                               |         |              |       | 630cse2   | 62                                |         |       |       |
|                             |                                  |         |              |       | 630csa1   | 80                                | 88      | 0.88  | 102.9 |
|                             |                                  |         |              |       | 630csa2   | 96                                |         |       |       |
|                             |                                  |         |              |       |           |                                   |         |       |       |
| 707CFU                      |                                  |         |              |       | 721CFU    |                                   |         |       |       |
| well                        | 5x10 <sup>3</sup> cell/well seed |         |              |       | well      | 1x10 <sup>4</sup> cell/well seed  |         |       |       |
|                             | colony #                         | average | %            |       |           | colony #                          | average | %     |       |
| 707pbs1                     | 37                               | 36.5    | 0.73         | 100   | 721pbs1   | 62                                | 67.5    | 0.675 | 100   |
| 707pbs2                     | 36                               |         |              |       | 721pbs2   | 73                                |         |       |       |
| 707chabc1                   | 25                               | 28      | 0.56         | 76.71 | 721chabc1 | 53                                | 49      | 0.49  | 72.59 |
| 707chabc2                   | 31                               |         |              |       | 721chabc2 | 45                                |         |       |       |
| 707cse1                     | 27                               | 26.5    | 0.53         | 72.6  | 721cse1   | 55                                | 57      | 0.57  | 84.44 |
| 707cse2                     | 26                               |         |              |       | 721cse2   | 59                                |         |       |       |
| 707csa1                     | 35                               | 33      | 0.66         | 90.41 | 721csa1   | 63                                | 63      | 0.63  | 93.33 |
| 707csa2                     | 31                               |         |              |       | 721csa2   | 63                                |         |       |       |

| Fig.5 CFU-GM assay summary |     |       |       |       |
|----------------------------|-----|-------|-------|-------|
|                            | PBS | ChABC | CSE   | CSA   |
| 609                        | 100 | 83.06 | 87.1  |       |
| 630                        | 100 | 85.38 | 80.12 | 102.9 |
| 707                        | 100 | 76.71 | 72.6  | 90.41 |
| 721                        | 100 | 72.59 | 84.44 | 93.33 |
|                            | PBS | ChABC | CSE   | CSA   |
| mean                       | 100 | 79.44 | 81.07 | 95.56 |
| sem                        | 0   | 2.926 | 3.166 | 3.779 |
| N                          | 4   | 4     | 4     | 3     |
